# Supplementary material for: A sustainable approach to separate and recover indium and tin from spent indium–tin oxide targets
Source: Royal Society of Chemistry journal article supplement (doi:10.1039/c7ra11976c), 2017-01-01
Supplement: c7ra11976c1.pdf [file c7ra11976c1.pdf]

## Electronic Supplementary Information

# A sustainable approach to separate and recover indium and tin from spent indium-tin oxide targets

Shuai Gu,<sup>\*,†,°</sup> Bitian Fu,<sup>‡,°</sup> Gjergj Dodbiba,<sup>†</sup> Toyohisa Fujita,<sup>†</sup> and Baizeng Fang<sup>\*,§</sup>

<sup>†</sup> Department of System Innovation, Graduate School of Engineering, The University of Tokyo, 7-3-1 Hongo, Bunkyo, Tokyo 113-8654, Japan. Email: [gushuai10084627@gmail.com](mailto:gushuai10084627@gmail.com)

<sup>‡</sup> School of Ecological and Environmental Sciences, East China Normal University, Shanghai 200241, China.

<sup>§</sup> Department of Chemical and Biological Engineering, University of British Columbia, 2360 East Mall, Vancouver, BC, V6T 1Z3, Canada. Email: [bfang@chbe.ubc.ca](mailto:bfang@chbe.ubc.ca)

### Composition of the spent ITO target

The spent ITO target was ground carefully into fine powder as shown in Figure S1. Then, a certain amount of the ITO powder was dissolved completely by fresh aqua regia. The bulk density of the spent ITO powder is 2.06 g/mL. The grain diameter distribution map is shown in Figure S2. The size of the spent ITO powder was mainly in the range of 1~100  $\mu\text{m}$  with the D50 being 6.781  $\mu\text{m}$ . After the leaching process, all the leaching solution was transferred into a volumetric flask and analyzed with a Perkin Elmer<sup>®</sup> Optima 5300 DV ICP-OES. Table S1 shows the detailed mass determined by ICP-OES for the species  $\text{In}^{3+}$ ,  $\text{Sn}^{4+}$ , and  $\text{Zn}^{2+}$  for three spent ITO powder samples.

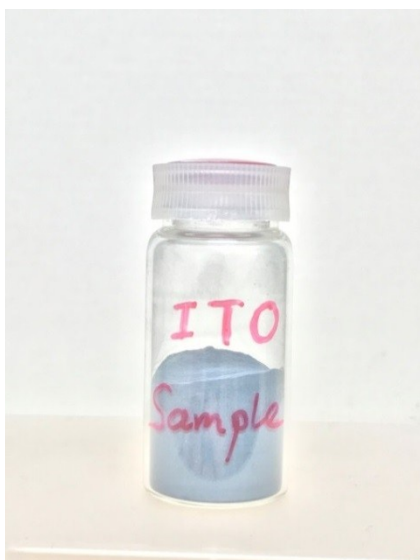

**Figure S1** A photograph for the ground ITO target powder.

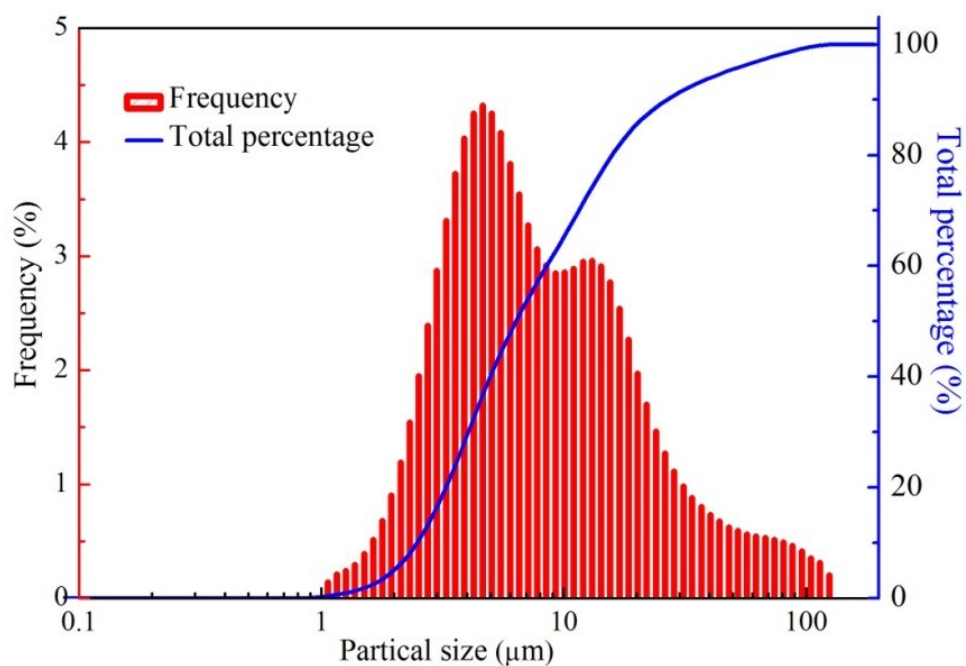

**Figure S2** Size distribution of the spent ITO powder.

**Table S1** The mass of  $\text{In}^{3+}$ ,  $\text{Sn}^{4+}$ , and  $\text{Zn}^{2+}$  determined by ICP-OES for the three ITO powder samples with different masses after dissolving by aqua regia with a solid to liquid ratio of 1g to 100 mL and at a leaching temperature of 40°C, a stirring rate of 500 rpm, and a leaching time of 2 h.

| ITO powder<br>(g) | $\text{In}^{3+}$ |       | $\text{Sn}^{4+}$ |      | $\text{Zn}^{2+}$ |      |
|-------------------|------------------|-------|------------------|------|------------------|------|
|                   | g                | wt%   | g                | wt%  | g                | wt%  |
| 3.275             | 2.5710           | 95.17 | 0.1274           | 4.71 | 0.003147         | 0.12 |
| 3.158             | 2.478995         | 17    | 0.1228           | 4.71 | 0.003041         | 0.12 |
| 3.098             | 2.4318           | 95.16 | 0.1206           | 4.72 | 0.002979         | 0.12 |

## Distillation of the leaching solution

After the leaching process, the acidity of the leaching solution was around 3.8 mol/L HCl. The leaching solution was then transferred to a rotary evaporator equipped with an oil bath and vacuum pump to distill HCl for reuse. The hydrate of indium chloride and tin chloride was left at the bottom of the flask. A rotary evaporator was utilized in the lab scale for the reduced pressure distillation, while for an industrial distillation a large HCl recovery setup will be needed. According to a survey on the internet, a 9000L waste HCl recovery setup only cost around \$40000, which is relatively cheap.

### Analysis of the hydrate metal chlorides

For some reason, we cannot access the standard card info of  $\text{InCl}_3 \cdot 4\text{H}_2\text{O}$  which makes it impossible to analyze the exact composition of the hydrate obtained in the distillation step. In order to confirm the co-existence of  $\text{InCl}_3 \cdot 4\text{H}_2\text{O}$  and  $\text{SnCl}_4 \cdot 5\text{H}_2\text{O}$  in the crystal, a similar process was adopted to obtain a mixed hydrate crystal of 94.5wt%  $\text{InCl}_3 \cdot 4\text{H}_2\text{O}$  and 5.5wt%  $\text{SnCl}_4 \cdot 5\text{H}_2\text{O}$  using analytical pure  $\text{InCl}_3 \cdot 4\text{H}_2\text{O}$  (99.99%) and  $\text{SnCl}_4 \cdot 5\text{H}_2\text{O}$  (99.9%) as the starting materials. First,  $\text{InCl}_3 \cdot 4\text{H}_2\text{O}$  and  $\text{SnCl}_4 \cdot 5\text{H}_2\text{O}$  were accurately weighed and then transferred into a 5M HCl solution. Next, the solution was distilled to obtain the crystal of  $\text{InCl}_3$  and  $\text{SnCl}_4$  hydrates. Since we do not have the standard pattern of  $\text{SnCl}_4 \cdot 5\text{H}_2\text{O}$ , an additional experiment was carried out to prove that the crystal produced in the distillation step was tin chloride pentahydrate. The  $\text{SnCl}_4$  hydrate was prepared by adding a certain amount of analytical pure  $\text{SnCl}_4 \cdot 5\text{H}_2\text{O}$  into 5M HCl solution for distillation. The obtained  $\text{SnCl}_4$  hydrate was coated with a layer of Vaseline to avoid the exposure to air and analyzed by XRD. The XRD patterns for the standard  $\text{SnCl}_4 \cdot 5\text{H}_2\text{O}$  and the  $\text{SnCl}_4$  hydrate are shown in Figure S3.

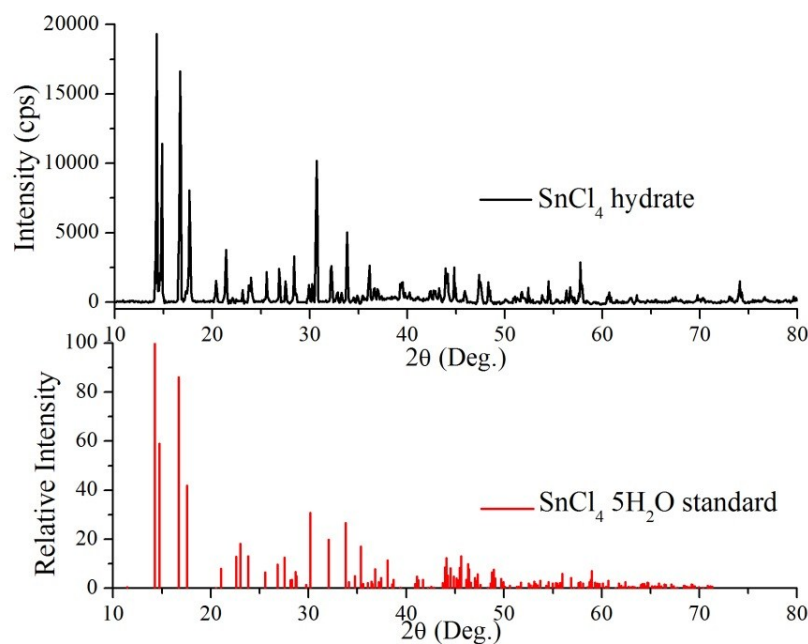

**Figure S3** XRD patterns of the hydrate obtained from the distilled  $\text{SnCl}_4$ -HCl solution and the standard  $\text{SnCl}_4 \cdot 5\text{H}_2\text{O}$  crystal.

At the meantime, the crystals recovered from the three spent ITO targets were also analyzed with ICP-OES, and the data are shown in Table S2. The content of the crystals was calculated based on the assumption that all  $\text{InCl}_3$

and  $\text{SnCl}_4$  hydrates were  $\text{InCl}_3 \cdot 4\text{H}_2\text{O}$  and  $\text{SnCl}_4 \cdot 5\text{H}_2\text{O}$ , respectively. This assumption makes sense due to the high similarity of XRD patterns shown in Figure S3 and the fact that the amounts of crystal water in  $\text{InCl}_3$  and  $\text{SnCl}_4$  have little influence on the products shown in equations (2) and (3). The crystals were determined to consist of 94.4wt%  $\text{InCl}_3 \cdot 4\text{H}_2\text{O}$  and 5.53wt%  $\text{SnCl}_4 \cdot 5\text{H}_2\text{O}$ .

**Table S2** The content of the crystals obtained from the spent ITO targets assuming that  $\text{InCl}_3$  and  $\text{SnCl}_4$  hydrate was  $\text{InCl}_3 \cdot 4\text{H}_2\text{O}$  and  $\text{SnCl}_4 \cdot 5\text{H}_2\text{O}$ , respectively.

| Targets<br>(g) | Crystals<br>(g) | $\text{InCl}_3 \cdot 4\text{H}_2\text{O}$ |                     | $\text{SnCl}_4 \cdot 5\text{H}_2\text{O}$ |                     |
|----------------|-----------------|-------------------------------------------|---------------------|-------------------------------------------|---------------------|
|                |                 | Mass (g)                                  | Mass percentage (%) | Mass (g)                                  | Mass percentage (%) |
| 1.098          | 2.328           | 2.196                                     | 94.33               | 0.1288                                    | 5.53                |
| 1.103          | 2.339           | 2.208                                     | 94.39               | 0.1293                                    | 5.53                |
| 1.056          | 2.240           | 2.115                                     | 94.42               | 0.1239                                    | 5.53                |

Figure S4 shows a photograph for the crystal obtained from an ITO target. The crystal is white powder which fumes on contact with air. The fuming of the crystal was mainly caused by  $\text{SnCl}_4 \cdot 5\text{H}_2\text{O}$ , which would easily decompose upon exposure to moist air according to the MSDS.

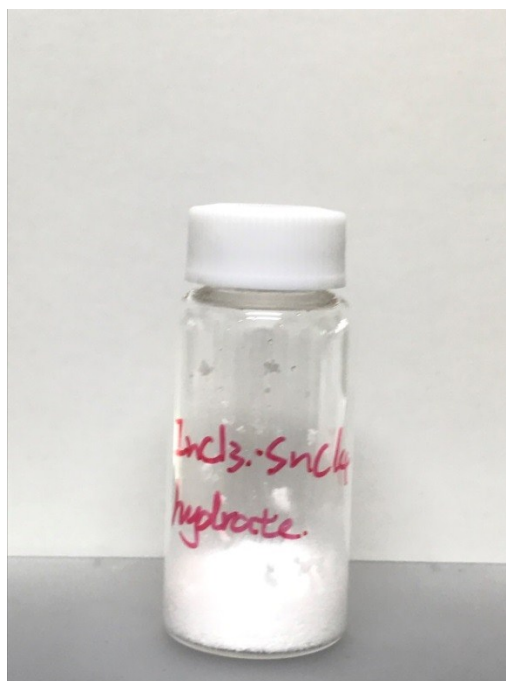

**Figure S4** A photograph for the recovered mixed crystal hydrates of  $\text{InCl}_3$  and  $\text{SnCl}_4$ .

**Table S3** Calculated secondary wastes produced in solvent-extraction, ion-exchange, and DDDF processes.

| Methods                                                | Processes                               | Secondary wastes                                                                            | Amount                                                                            |
|--------------------------------------------------------|-----------------------------------------|---------------------------------------------------------------------------------------------|-----------------------------------------------------------------------------------|
| Solvent extraction with D2EHPA                         | H <sub>2</sub> SO <sub>4</sub> leaching | –                                                                                           | –                                                                                 |
|                                                        | pH adjustment                           | –                                                                                           | –                                                                                 |
|                                                        | Extraction (twice)                      | 1M H <sub>2</sub> SO <sub>4</sub> solution                                                  | 1000L                                                                             |
|                                                        | Stripping (twice)                       | 20% D2EHPA kerosene<br>1.5M HCl solution                                                    | 250L<br>250L                                                                      |
| Solvent extraction with TBP                            | HCl leaching                            | –                                                                                           | –                                                                                 |
|                                                        | pH adjustment                           | –                                                                                           | –                                                                                 |
|                                                        | Extraction (once)                       | 1M HCl solution<br>1M TBP kerosene                                                          | 1000L<br>1000L                                                                    |
| Ion-exchange with DODGAA-IL                            | HNO <sub>3</sub> leaching               | –                                                                                           | –                                                                                 |
|                                                        | pH adjustment                           | –                                                                                           | –                                                                                 |
|                                                        | Adsorbent synthesis                     | Acetone with IL and DODGAA                                                                  | 151L                                                                              |
|                                                        | Adsorption                              | pH=2 HNO <sub>3</sub> solution                                                              | 1570.1 L                                                                          |
|                                                        | In <sup>3+</sup> elution                | 2.5M HNO <sub>3</sub> solution                                                              | 130.8L                                                                            |
|                                                        | Sn <sup>4+</sup> elution                | 5M HNO <sub>3</sub> solution<br>DODGAA-IL resin                                             | 130.8L<br>45kg                                                                    |
| DDDF and handling of HCl and SO <sub>2</sub> mixed gas | HCl leaching                            | –                                                                                           | –                                                                                 |
|                                                        | Vacuum distillation                     | –                                                                                           | –                                                                                 |
|                                                        | Dehydration                             | SO <sub>2</sub>                                                                             | 117.8 M SO <sub>2</sub>                                                           |
|                                                        |                                         | HCl                                                                                         | 235.5M HCl                                                                        |
|                                                        | Fractionation                           | –                                                                                           | –                                                                                 |
|                                                        | Vacuum heating                          | –                                                                                           | –                                                                                 |
|                                                        | Reuse and collection                    | Sodium sulfite. Byproducts: HCl solution, SO <sub>2</sub> , and 7.268L of SOCl <sub>2</sub> | 10L of Na <sub>2</sub> SO <sub>3</sub> solution                                   |
|                                                        | Or disposal with Ca(OH) <sub>2</sub>    | CaSO <sub>3</sub> , CaCl <sub>2</sub> , and H <sub>2</sub> O                                | 8.72kg CaSO <sub>3</sub> , 8.72kg CaCl <sub>2</sub> , and 6.36kg H <sub>2</sub> O |

**Dehydration and fractionation**

During the dehydration process, a simulated indium and tin chloride solution was prepared, which has an actual ratio of indium and tin in the spent ITO target. Indium chloride and tin chloride were dissolved in 5M HCl solution and then distilled under a reduced pressure to obtain the crystal of indium and tin chloride hydrates. Next, the crystal was finely ground and put into a flask of freshly distilled  $\text{SOCl}_2$  with a ratio of crystal to  $\text{SOCl}_2$  of 1 g to 1.2 mL. Sulfur dioxide and hydrogen chloride immediately bubbled out of the solution. After bubbling stopped, the flask was heated to 90 °C to reflux the slurry for 2h. Figure S5 shows the setup for dehydrating process. Then the flask was cooled down and equipped with a Vigreux fractionating column to separate  $\text{SOCl}_2$  and anhydrous tin chloride. Anhydrous  $\text{InCl}_3$ ,  $\text{SnCl}_4$ , and  $\text{SOCl}_2$  co-exist in the flask. As can be seen from Figure S6, anhydrous  $\text{InCl}_3$  is insoluble in both  $\text{SnCl}_4$  and  $\text{SOCl}_2$  solution and the solubility does not change with the temperature. This indicates that the appearance of anhydrous  $\text{InCl}_3$  would not affect the fractionation of  $\text{SnCl}_4$  and  $\text{SOCl}_2$ . The fractionation of  $\text{SnCl}_4$  and  $\text{SOCl}_2$  was processed according to Figure3 when the purity of  $\text{SnCl}_4$  at the bottom of the flask is high enough ( $>99\%$ ),  $\text{SOCl}_2$  (Density: 1.64g/ml) can be distilled out of the flask with 5 theoretical plates to reach 99.9% purity. The consumption and recovery rate of  $\text{SOCl}_2$  is shown in Table S4. The average recovery rate of  $\text{SOCl}_2$  is around 91%. Figure S7 shows the setup for the fractionation process.

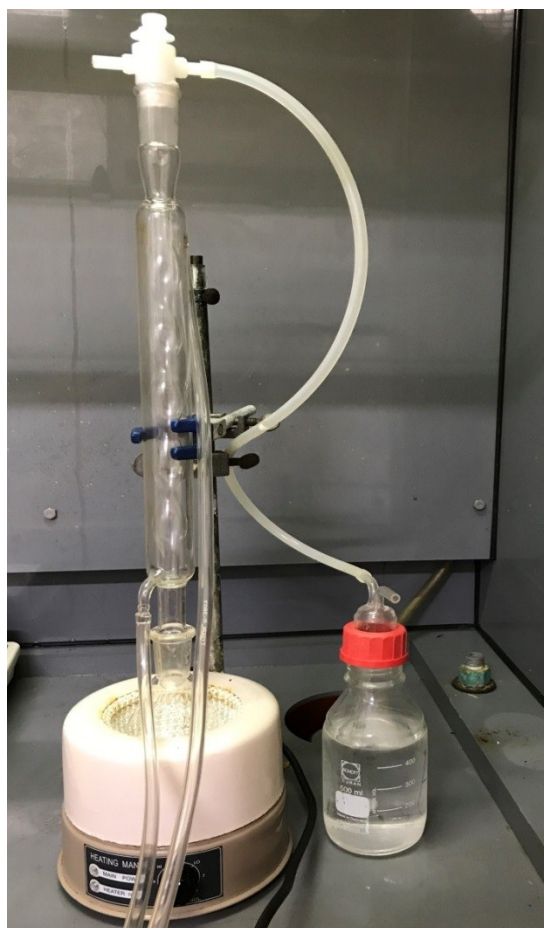

**Figure S5** The setup of dehydrating process.

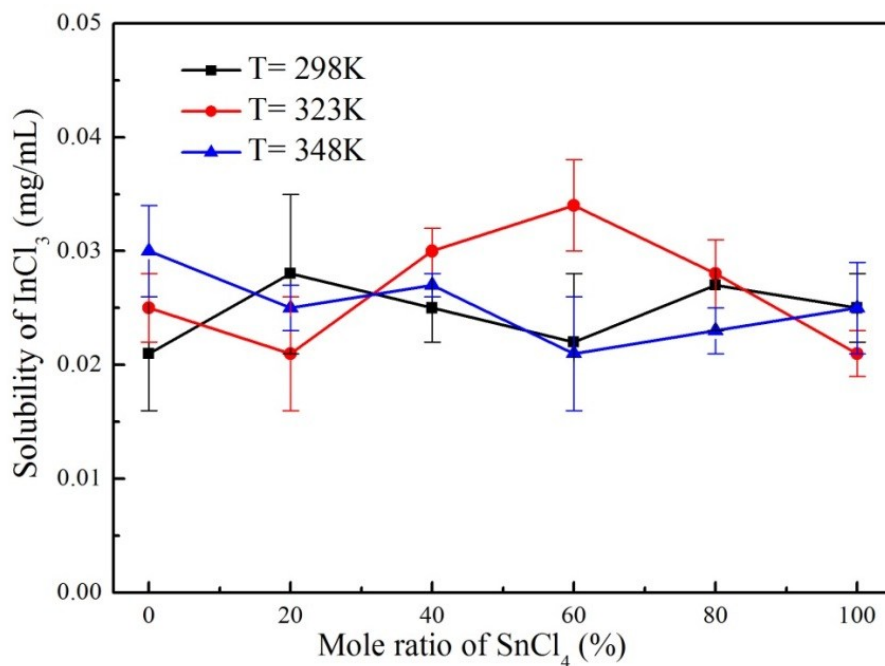

**Figure S6** The solid-liquid equilibrium of anhydrous  $\text{InCl}_3$  with  $\text{SnCl}_4$  and  $\text{SOCl}_2$  at different temperatures.

**Table S4** Consumption and recovery rate of  $\text{SOCl}_2$  in the DDDF process.

| ITO   | Hydrate (g) | $\text{SOCl}_2$ added (ml) | $\text{SOCl}_2$ consumed (mL) | $\text{SOCl}_2$ recovered (g) | Recovery rate (%) |
|-------|-------------|----------------------------|-------------------------------|-------------------------------|-------------------|
| 5.079 | 10.77       | 13.00                      | 10.67                         | 3.515                         | 91.99             |
| 5.018 | 10.64       | 13.00                      | 10.54                         | 3.676                         | 91.12             |
| 5.027 | 10.66       | 13.00                      | 10.56                         | 3.628                         | 90.66             |

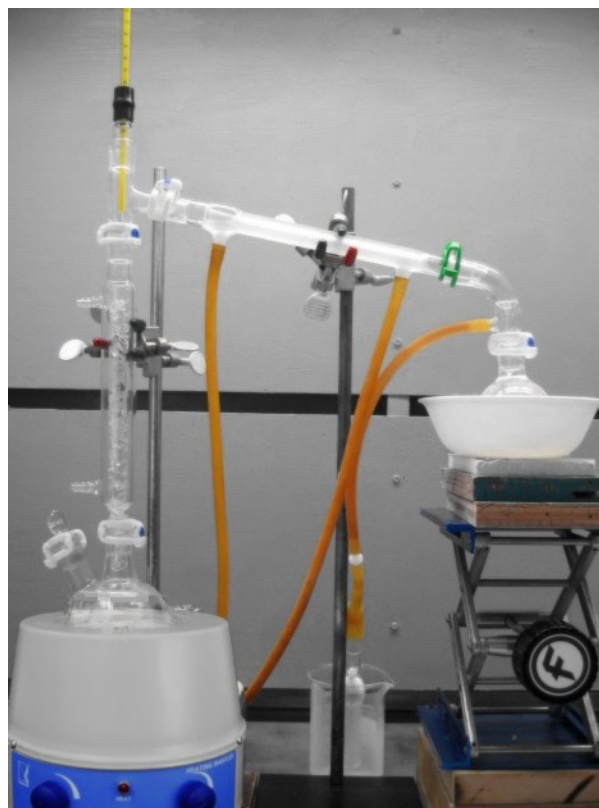

**Figure S7** The setup of fractionation process.

### Characterization of anhydrous $\text{InCl}_3$ and $\text{SnCl}_4$

Figure S8A shows a photograph for the anhydrous  $\text{InCl}_3$  obtained after fractionation, which is white powder. The anhydrous powder was washed with  $\text{SOCl}_2$  solution for three times to wash away the residual  $\text{SnCl}_4$ . After that, the white powder remained in the flask was filtered out of the solution and moved to a vacuum drier at  $90^\circ\text{C}$  to get rid of the excess  $\text{SOCl}_2$ . The as-obtained anhydrous  $\text{InCl}_3$  was then transferred into a dry box and kept in a suitable container that can be sealed. The anhydrous  $\text{InCl}_3$  was analyzed with XRD in an air-sensitive sample holder to avoid any contact with air. The purity of  $\text{InCl}_3$  was calculated according to the XRD pattern shown in Figure 3.  $\text{In}^{3+}$  concentration in a certain amount of  $\text{InCl}_3$  was determined by ICP-OES. The recovery rate of indium was calculated by dissolving all the  $\text{InCl}_3$  obtained in this process and measuring the concentration of  $\text{In}^{3+}$  with ICP-OES, and the data are shown in Table S5.

**Table S5** The purity of  $\text{InCl}_3$  and  $\text{SnCl}_4$  measured by ICP-OES.

| $\text{InCl}_3$ (g) | $\text{SnCl}_4$ (g) | Measured $\text{In}^{3+}$ (g) | Measured $\text{Sn}^{4+}$ (g) | Purity of $\text{InCl}_3$ (%) | Purity of $\text{SnCl}_4$ (%) |
|---------------------|---------------------|-------------------------------|-------------------------------|-------------------------------|-------------------------------|
| 1.056               | 1.102               | 0.5472                        | 0.4987                        | 99.82                         | 99.71                         |
| 1.013               | 1.089               | 0.5250                        | 0.4927                        | 99.83                         | 99.68                         |
| 1.071               | 1.054               | 0.5548                        | 0.4770                        | 99.79                         | 99.72                         |



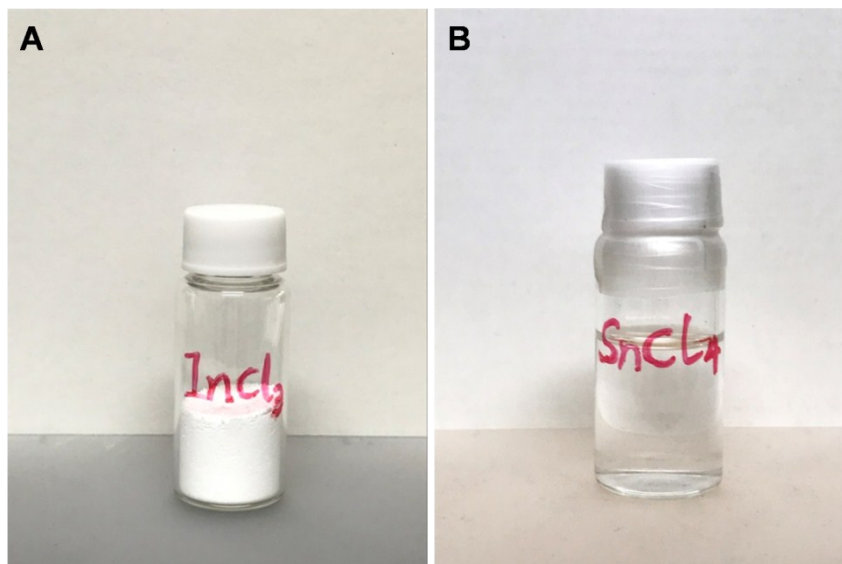

**Figure S8** A photograph for the as-filtrated anhydrous  $\text{InCl}_3$  (A) and  $\text{SnCl}_4$  (B).

After the fractionation process,  $\text{SnCl}_4$  was collected and moved into a vacuum drying machine and heated at  $100^\circ\text{C}$  for 24 h to get rid of any remaining  $\text{SOCl}_2$  in the solution. Figure S8B shows the anhydrous  $\text{SnCl}_4$  obtained after this process. The purity of  $\text{SnCl}_4$  obtained in this process was calculated by measuring the concentration of  $\text{Sn}^{4+}$  in a certain amount of  $\text{SnCl}_4$  obtained, while the recovery rate of tin was determined by dissolving all the  $\text{SnCl}_4$  obtained in this process and measuring the concentration of  $\text{Sn}^{4+}$  with ICP-OES. The data for the purity of  $\text{SnCl}_4$  are also shown in Table S5.

### **The reuse and disposal of the hazardous gases produced in the dehydration process**

As can be seen from equations (2) and (3),  $\text{HCl}$  and  $\text{SO}_2$  gases were emitted during the dehydration process, and this mixed gas can either be reused or disposed with alkali. Because the solubility of  $\text{SO}_2$  in  $\text{H}_2\text{O}$  is highly dependent on temperature resulting in enormous solubility difference between  $\text{HCl}$  and  $\text{SO}_2$ ,  $\text{HCl}$  gas can be separated from  $\text{SO}_2$  gas by scrubbing with hot water. By scrubbing the mixed gas with hot water (e.g.,  $40^\circ\text{C}$ ),  $\text{HCl}$  can be dissolved with high selectivity, while the majority of  $\text{SO}_2$  discharged from hot water. The obtained solution may still contain a little amount of  $\text{SO}_2$ , which can be purified if needed. After the dissolution with hot water, a small amount of  $\text{HCl}$  may still remain in the  $\text{SO}_2$  gas due to its relatively high vapor pressure and incomplete dissolution. A cold saturated solution of sulfurous acid can then be used to further dissolve the remaining  $\text{HCl}$ . After which, the gas can finally be dried with desiccant (e.g.,  $\text{CaCl}_2$ ), so that a purified  $\text{SO}_2$  gas stream can be obtained and collected for sale. The other option is to dispose the mixed gas with lime as shown in equations (S1) and (S2). The hazardous gases emitted from the flask during the dehydration process in lab scale were bubbled in a saturated  $\text{Ca}(\text{OH})_2$  solution to remove  $\text{SO}_2$  and  $\text{HCl}$  gas, as shown in Figure S5.

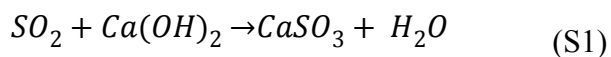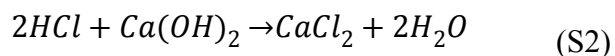

## **The comparison of recycling 1 kg spent ITO target between solvent-extraction, ion-exchange, and DDDF processes**

To demonstrate the superiority of DDDF process, a calculation has been done according to the experiments done by Virolainen and Schaeffer. 1kg of spent ITO target with a mass ratio of  $\text{In}_2\text{O}_3$  to  $\text{SnO}_2$  around 95:5 was used as the recycling target. ITO powder was first dissolved by 3M HCl/  $\text{H}_2\text{SO}_4$ /  $\text{HNO}_3$ , with a solid-liquid ratio of 1g/10mL, temperature of 40°C, stirring rate of 500 rpm, and leaching time of 2h. The leaching solution was then used as the source for the separation and recycling of indium and tin. In the solvent extraction with D2EHPA process, both indium and tin can be extracted into the organic phase from  $\text{H}_2\text{SO}_4$  solution. After extraction, the organic phase was selectively stripped with 1.5M HCl solution to strip indium from the organic phase, and thus separate indium from tin. In the solvent extraction with TBP process, 3M HCl was used as the leaching solution, and after the dissolution the leaching solution was then diluted with distilled water to adjust the pH value. Afterwards, 1M TBP in kerosene was used to extract tin into the organic phase, while the majority of indium remained in the aqueous phase. In the ion-exchange process, a solvent impregnated resin (SIR) was used to separate indium from tin. DODGAA and the ionic liquid  $[\text{C}_4\text{min}][\text{Tf}_2\text{N}]$  with a ratio of 1:1 was mixed with Amberlite XAD-7 resin in acetone solution to synthesize the SIR. This resin can adsorb both indium and tin in  $\text{HNO}_3$  solution. After the adsorption, indium and tin were eluted with 2.5M  $\text{HNO}_3$  and 5M  $\text{HNO}_3$ , respectively. Table S3, S5, S6, and S7 shows the calculated secondary wastes, energy consumptions, products, and reagent consumptions in solvent-extraction, ion-exchange, and DDDF processes, respectively. In the DDDF process, 7.268 L of  $\text{SOCl}_2$  was recovered (recovery rate: 91.9%). Energy consumptions were calculated by the power of the equipment used and the duration of which was used. The reuse or disposal of the mixed gas was not calculated in the energy consumption part. Secondary wastes produced in these processes only concerns about the extractions, diluents, stripping reagents, and eluents. The washing, regeneration, resin-pretreatment processes were not considered.

**Table S6** Calculated energy consumptions in solvent-extraction, ion-exchange, and DDDF processes.

| Methods                        | Processes                               | Equipment            | Power(kW/h) | Time(h) | Work(kW) |
|--------------------------------|-----------------------------------------|----------------------|-------------|---------|----------|
| Solvent extraction with D2EHPA | H <sub>2</sub> SO <sub>4</sub> leaching | Stirring hotplate×2  | 1.2         | 2       | 4.8      |
|                                | pH adjustment                           | Stirring×2           | 1           | 0.5     | 1        |
|                                | Extraction (twice)                      | Water bath shaker×40 | 2           | 0.2     | 16       |
|                                | Stripping (twice)                       | Water bath shaker×40 | 2           | 0.2     | 16       |
| Solvent extraction with TBP    | HCl leaching                            | Stirring hotplate×2  | 1.2         | 2       | 4.8      |
|                                | pH adjustment                           | Stirring×2           | 1           | 0.2     | 1        |
|                                | Extraction (once)                       | Water bath shaker×40 | 2           | 0.2     | 16       |
| Ion-exchange with DODGAA-IL    | HNO <sub>3</sub> leaching               | Stirring hotplate×2  | 1.2         | 2       | 4.8      |
|                                | pH adjustment                           | Stirring×2           | 1           | 0.5     | 1        |
|                                | Adsorbent synthesis                     | Water bath shaker×20 | 2           | 12      | 480      |
|                                |                                         | Rotary evaporator×30 | 1.5         | 3       | 135      |
|                                | Adsorption                              | Water bath shaker×30 | 2           | 0.5     | 30       |
|                                | In <sup>3+</sup> elution                | Peristaltic pump×645 | 0.02        | 2       | 25.8     |
|                                | Sn <sup>4+</sup> elution                | Peristaltic pump×645 | 0.02        | 2       | 25.8     |
| DDDF                           | HCl leaching                            | Stirring hotplate×2  | 1.2         | 2       | 4.8      |
|                                | Vacuum distillation                     | Rotary evaporator×5  | 1.5         | 2       | 15       |
|                                | Dehydration                             | Mandarin heater×25   | 0.25        | 2       | 12.5     |
|                                | Fractionation                           | Mandarin heater×25   | 0.25        | 2       | 12.5     |
|                                | Vacuum heating                          | Vacuum oven×1        | 2           | 3       | 6        |

**Table S7** Calculated products in solvent-extraction, ion-exchange, and DDDF processes.

| Methods           | Solvent extraction with D2EHPA       |                            | Solvent extraction with TBP         |                         | Ion-exchange with DODGAA-IL                         |                                                   | DDDF                        |                             |
|-------------------|--------------------------------------|----------------------------|-------------------------------------|-------------------------|-----------------------------------------------------|---------------------------------------------------|-----------------------------|-----------------------------|
|                   | In <sup>3+</sup> in 250L of 1.5M HCl | Sn <sup>4+</sup> in D2EHPA | In <sup>3+</sup> in 1000L of 1M HCl | Sn <sup>4+</sup> in TBP | In <sup>3+</sup> in 130.8L of 2.5M HNO <sub>3</sub> | Sn <sup>4+</sup> in 130.8L of 5M HNO <sub>3</sub> | Anhydrous InCl <sub>3</sub> | Anhydrous SnCl <sub>4</sub> |
| Recovery rate (%) | 97.4                                 | –                          | 99.3                                | –                       | 92.2                                                | 87.3                                              | 99.6                        | 98.6                        |
| Purity (%)        | 99.8                                 | –                          | 96.5                                | –                       | 96.9                                                | 48.9                                              | 99.8                        | 99.7                        |

**Table S8** Calculated reagent consumption in solvent-extraction, ion-exchange, and DDDF processes.

| Methods                                                | Processes                               | Other reagents                                                   | H <sub>2</sub> O (L) | HCl (L) | H <sub>2</sub> SO <sub>4</sub> (L) | HNO <sub>3</sub> (L) |
|--------------------------------------------------------|-----------------------------------------|------------------------------------------------------------------|----------------------|---------|------------------------------------|----------------------|
| Solvent extraction with D2EHPA                         | H <sub>2</sub> SO <sub>4</sub> leaching | –                                                                | 8.37                 | –       | 1.63                               | –                    |
|                                                        | pH adjustment                           | –                                                                | 937.3                | –       | 52.7                               | –                    |
|                                                        | Extraction (twice)                      | D2EHPA: 50L<br>Kerosene: 200L                                    | –                    | –       | –                                  | –                    |
| Solvent extraction with TBP                            | Stripping (twice)                       | –                                                                | 218.75               | 31.25   | –                                  | –                    |
|                                                        | HCl leaching                            | –                                                                | 7.5                  | 2.5     | –                                  | –                    |
|                                                        | pH adjustment                           | –                                                                | 909.17               | 80.83   | –                                  | –                    |
|                                                        | Extraction (once)                       | TBP: 273L<br>Kerosene: 727L                                      | –                    | –       | –                                  | –                    |
| Ion-exchange with DODGAA-IL                            | HNO <sub>3</sub> leaching               | –                                                                | 7.5                  | 2.5     | –                                  | –                    |
|                                                        | pH adjustment                           | NaOH: 0.8468 kg                                                  | 1560                 | –       | –                                  | –                    |
|                                                        | Adsorbent synthesis                     | XAF-7 resin: 30.2 kg                                             | –                    | –       | –                                  | –                    |
|                                                        |                                         | DODGAA: 7.55 kg                                                  | –                    | –       | –                                  | –                    |
|                                                        |                                         | [C <sub>4</sub> mim][Tf <sub>2</sub> N]: 7.55kg<br>Acetone: 151L | –                    | –       | –                                  | –                    |
|                                                        | Adsorption                              | –                                                                | –                    | –       | –                                  | –                    |
|                                                        | In <sup>3+</sup> elution                | –                                                                | 108.25               | –       | –                                  | 22.55                |
| Sn <sup>4+</sup> elution                               | –                                       | 85.7                                                             | –                    | –       | 45.1                               |                      |
| DDDF and handling of HCl and SO <sub>2</sub> mixed gas | HCl leaching                            | –                                                                | 7.5                  | 2.5     | –                                  | –                    |
|                                                        | Vacuum distillation                     | –                                                                | –                    | –       | –                                  | –                    |
|                                                        | Dehydration                             | SOCl <sub>2</sub> : 10L                                          | –                    | –       | –                                  | –                    |
|                                                        | Fractionation                           | –                                                                | –                    | –       | –                                  | –                    |
|                                                        | Vacuum heating                          | –                                                                | –                    | –       | –                                  | –                    |
|                                                        | Reuse and collection                    | Na <sub>2</sub> SO <sub>3</sub> : 10L                            | 16.39                | –       | –                                  | –                    |
| Or disposal with Ca(OH) <sub>2</sub>                   | Ca(OH) <sub>2</sub> : 17.45kg           | –                                                                | –                    | –       | –                                  |                      |
